# Supplementary material for: Carbon Exchange in an Amazon Forest: from Hours to Years
Source: Copernicus journal article supplement (doi:10.5194/bg-2018-131), 2018-04-13
Supplement: Supplementary file 1 [file bg-2018-131-supplement.pdf]

Supplemental Figures: Figures S1 and S2.

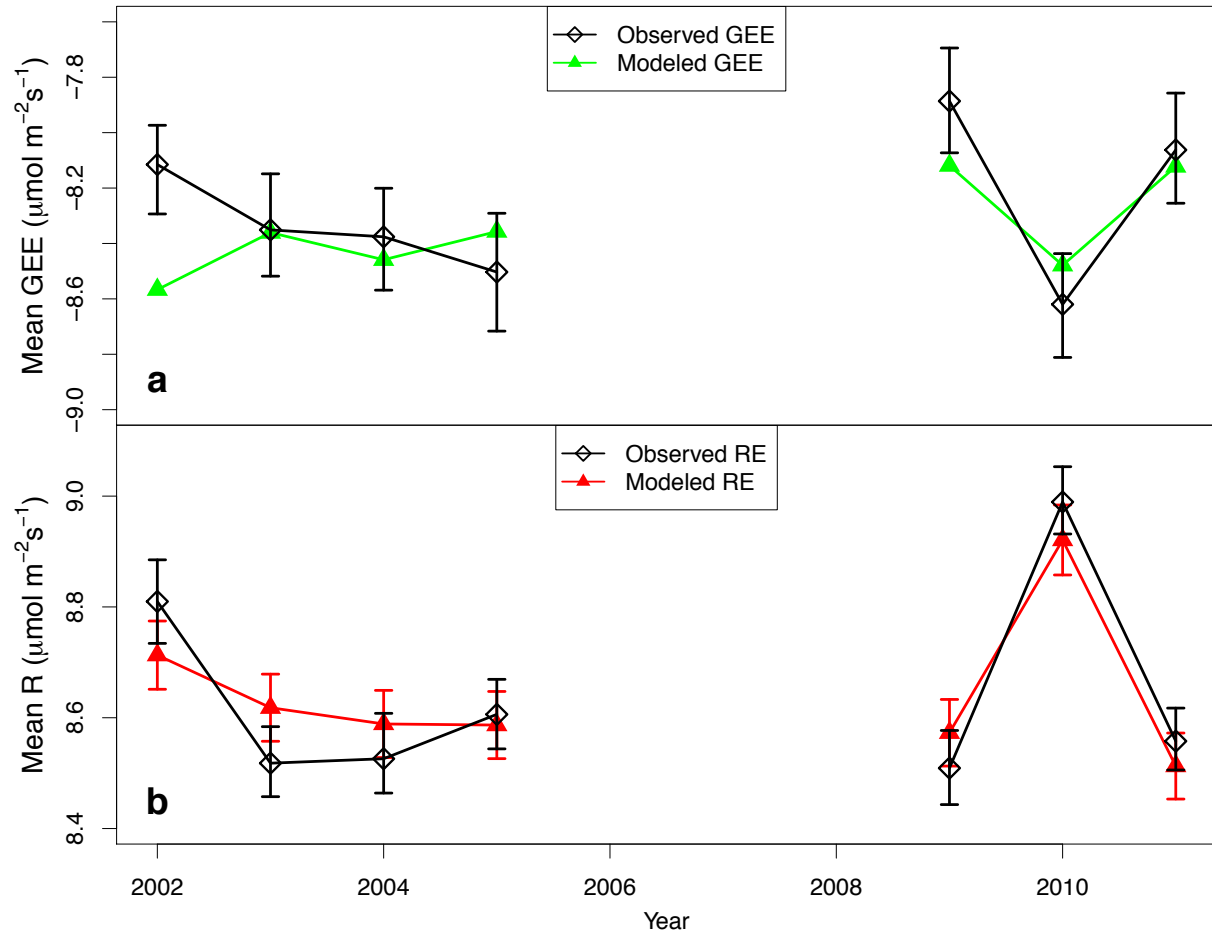

Figure S1. (a) Annual average partitioned GEE (black diamonds) and annual average modeled GEE (green triangles). (b) Annual average RE (observed nighttime NEE) (black diamonds) and annual average modeled RE (red triangles).

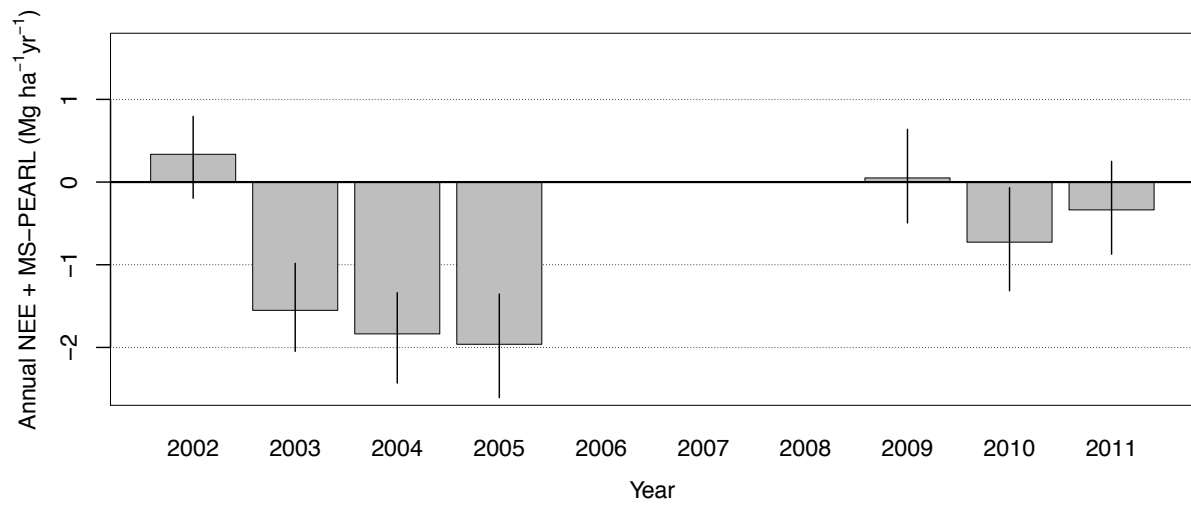

Figure S2. Annual NEE adjusted by alternative bias correction from Hayek et al. (2018).
